# Supplementary material for: Anthropogenic climate change is worsening North American pollen seasons
Source: PubMed Central journal article supplement (PMC7896283; doi:10.1073/pnas.2013284118), 2021-02-08
Supplement: pnas.2013284118.sapp.pdf [file pnas.2013284118.sapp.pdf]

1 **Anthropogenic climate change is worsening North American pollen**  
2 **seasons**

3  
4 **Supplementary Tables**

5 Table S1: List of the cities included in the study, number of years of data per city, and average  
6 number of observations per year at each station.

| Station                 | Nyears | Ave.Nobs |
|-------------------------|--------|----------|
| 1-Eugene                | 19     | 171.6    |
| 3-Seattle               | 16     | 182.6    |
| 4- Colorado Springs     | 16     | 242.3    |
| 9- Pleasanton           | 16     | 85.3     |
| 10- Roseville           | 19     | 46.9     |
| 11- Draper              | 16     | 128.4    |
| 14- Santa Barbara       | 7      | 135.4    |
| 24- Fargo               | 9      | 128.4    |
| 28- Onalaska (LaCrosse) | 15     | 91.4     |
| 32- Minneapolis         | 9      | 168.3    |
| 33- Bellevue (Omaha)    | 29     | 267.5    |
| 35- St. Louis           | 19     | 247.3    |
| 41- Lexington           | 15     | 127.2    |
| 47- Tulsa               | 16     | 155.5    |
| 49- Marietta (Atlanta)  | 19     | 252.5    |
| 51- Baltimore           | 15     | 213.1    |
| 52- Charlotte           | 16     | 74.3     |
| 55- Huntsville          | 10     | 102.4    |
| 58- Tallahassee         | 5      | 229.0    |
| 59- Tampa               | 9      | 81.9     |
| 60- Silver Spring       | 19     | 198.4    |
| 62- Brooklyn            | 9      | 133.0    |
| 65- Erie                | 15     | 123.4    |
| 66- Olean               | 15     | 86.5     |
| 69- Rochester           | 15     | 159.2    |
| 85- Mountain View       | 16     | 48.7     |

|                                        |    |       |
|----------------------------------------|----|-------|
| 86- Sparks (Reno)                      | 16 | 51.6  |
| 94- Waterbury                          | 15 | 124.8 |
| 97- Kansas City                        | 15 | 168.5 |
| 100- College Station                   | 16 | 232.3 |
| 102- Louisville                        | 6  | 87.0  |
| 103- Oklahoma City                     | 19 | 236.7 |
| 105- Waco (Station 1)                  | 16 | 243.3 |
| 106- Waco (Station 2)                  | 19 | 234.7 |
| 110- London                            | 18 | 235.3 |
| 111- Austin Area (Georgetown)          | 16 | 251.2 |
| 134- Albany                            | 9  | 196.9 |
| 138- Savannah                          | 16 | 45.3  |
| 141- Niagara Falls                     | 8  | 184.4 |
| 143- Baton Rouge                       | 5  | 74.5  |
| 146- Armonk                            | 15 | 137.3 |
| 151- Madison                           | 15 | 118.5 |
| 154- Greenville                        | 16 | 197.6 |
| 157- York                              | 15 | 150.6 |
| 159- San Diego                         | 16 | 342.4 |
| 167- Houston (Station 1)               | 5  | 154.6 |
| 172- Stockton                          | 7  | 137.5 |
| 181- Flower Mound                      | 12 | 352.7 |
| 188- Houston (Station 2)               | 11 | 213.7 |
| 189- New York                          | 9  | 171.0 |
| 192- Birmingham                        | 10 | 230.9 |
| 194- Springfield                       | 9  | 160.6 |
| 196- Denver                            | 8  | 144.9 |
| 198- San Antonio                       | 9  | 322.8 |
| 202- Asheville                         | 9  | 143.4 |
| 203- Midland                           | 8  | 53.9  |
| 213- Northern Kentucky<br>(Cincinnati) | 6  | 75.0  |
| Fairbanks, AK                          | 19 | -     |
| Winnipeg, Canada                       | 23 | -     |
| Saskatoon, Canada                      | 22 | -     |

7

8

9 Table S2: Temporal trends in total annual integrals using different thresholds of the minimum  
10 number of stations. Displayed is the slope of log-transformed annual pollen integrals against time  
11 and the p-value of the mixed effects model.

| Model                   | Slope | p-value |
|-------------------------|-------|---------|
| All station-years       | 0.007 | <0.0001 |
| Years with >5 stations  | 0.005 | <0.0001 |
| Years with >40 stations | 0.004 | 0.005   |

12  
13  
14  
15  
16  
17  
18  
19  
20  
21  
22  
23  
24  
25  
26  
27  
28

29 Table S3: Temporal trends in 10 pollen season metrics. Displayed is the slope of log-transformed  
 30 pollen metrics against time, back-transformed change over 1990-2018 in % for concentrations  
 31 and days for start date, end date, and season length metrics, and the p-value of the mixed effects  
 32 model. \*=variable where square-root transform was needed instead of log-transformation.

| Pollen metric       | Slope   | Change | p-value |
|---------------------|---------|--------|---------|
| Maximum daily count | 0.009   | +24%   | <0.0001 |
| Mean daily count    | 0.005   | +14.8% | <0.0001 |
| Median daily count  | 0.002   | +5.7%  | 0.1     |
| Season start date*  | -0.015  | -20d   | 0.01    |
| Season end date     | -0.0001 | -1d    | 0.1     |
| Season length       | 0.0008  | +8d    | 0.0003  |
| Spring total count  | 0.008   | +21.5% | <0.0001 |
| Summer total count  | -0.004  | -11.4% | 0.006   |
| Fall total count    | -0.001  | -3.3%  | 0.44    |
| Annual total count  | 0.007   | +20.9% | <0.0001 |

33  
 34  
 35  
 36  
 37  
 38  
 39  
 40  
 41  
 42  
 43  
 44

45 Table S4: Model selection results for climate-pollen models. Model formula, Akaike Information  
 46 Criterion (AIC), and marginal and conditional  $R^2$  value for the mixed effects model.

| Model                          | AIC     | $R^2_{\text{marginal}}$ | $R^2_{\text{conditional}}$ |
|--------------------------------|---------|-------------------------|----------------------------|
| AnnualCount ~ CO2              | -2655.6 | 0.01                    | 0.9                        |
| AnnualCount ~ CO2 + AnnualTemp | -2654.7 | 0.149                   | 0.88                       |
| AnnualCount ~ AnnualTemp       | -2652.9 | 0.2                     | 0.87                       |
|                                |         |                         |                            |
| SpringCount ~ CO2 + AnnualTemp | -1969.6 | 0.11                    | 0.85                       |
| SpringCount ~ AnnualTemp       | -1968.6 | 0.14                    | 0.83                       |
|                                |         |                         |                            |
| StartDate ~ SpringTemp         | 2522    | 0.25                    | 0.67                       |
| StartDate ~ AnnualTemp         | 2522.6  | 0.37                    | 0.71                       |
|                                |         |                         |                            |
| SeasonLength ~ AnnualTemp      | 2418    | 0.21                    | 0.51                       |

47  
 48  
 49  
 50  
 51  
 52  
 53  
 54  
 55  
 56  
 57  
 58  
 59  
 60

61 Table S5: Earth system models included in this analysis.

| <b>Model</b> | <b>Center</b>                                                                                                                                               | <b>CMIP5/6</b> | <b>Reference</b> |
|--------------|-------------------------------------------------------------------------------------------------------------------------------------------------------------|----------------|------------------|
| ACCESS1-0    | Commonwealth Scientific and Industrial Research Organisation, Bureau of Meteorology                                                                         | CMIP5          | (1)              |
| ACCESS1-3    | Commonwealth Scientific and Industrial Research Organisation, Bureau of Meteorology                                                                         | CMIP5          | (1)              |
| CanESM2      | Canadian Centre for Climate Modelling and Analysis                                                                                                          | CMIP5          | (2)              |
| Mk3-6-0      | Commonwealth Scientific and Industrial Research Organisation                                                                                                | CMIP5          | (3)              |
| INM CM4      | Institute for Numerical Mathematics                                                                                                                         | CMIP5          | (4)              |
| CM5A-LR      | Institut Pierre Simon Laplace                                                                                                                               | CMIP5          | (5)              |
| CM5A-MR      | Institut Pierre Simon Laplace                                                                                                                               | CMIP5          | (5)              |
| CM5B-LR      | Institut Pierre Simon Laplace                                                                                                                               | CMIP5          | (5)              |
| MIROC-ESM    | Japan Agency for Marine-Earth Science and Technology (JAMSTEC) and Centre for Climate System Research / National Institute for Environmental Studies, Japan | CMIP5          | (6)              |
| MIROC5       | Japan Agency for Marine-Earth Science and Technology (JAMSTEC) and Centre for Climate System Research / National Institute for Environmental Studies, Japan | CMIP5          | (6)              |
| MPI-ESM-LR   | Max Plank Institute for Meteorology                                                                                                                         | CMIP5          | (7)              |
| MPI-ESM-MR   | Max Plank Institute for Meteorology                                                                                                                         | CMIP5          | (7)              |
| MRI-CGCM3    | Meteorological Research Institute (MRI) of Japan                                                                                                            | CMIP5          | (8)              |
| MRI-ESM1     | Meteorological Research Institute (MRI) of Japan                                                                                                            | CMIP5          | (8)              |
| CSM2-MR      | Beijing Climate Center                                                                                                                                      | CMIP6          | (9)              |
| ESM1         | Beijing Climate Center                                                                                                                                      | CMIP6          | (10)             |
| CAMS-CSM1    | Chinese Academy of Meteorological Sciences                                                                                                                  | CMIP6          | (11)             |
| CanESM5      | Canadian Centre for Climate Modelling and Analysis                                                                                                          | CMIP6          | (12)             |
| CESM2        | National Center for Atmospheric Research                                                                                                                    | CMIP6          | (13)             |
| CM6A-LR      | Institut Pierre Simon Laplace                                                                                                                               | CMIP6          | (14)             |
| MIROC6       | Japan Agency for Marine-Earth Science and Technology (JAMSTEC) and Centre for Climate System Research / National Institute for Environmental Studies, Japan | CMIP6          | (15)             |
| MRI-ESM2     | Meteorological Research Institute (MRI) of Japan                                                                                                            | CMIP6          | (16)             |

62

63

64 **Supplementary Figures**

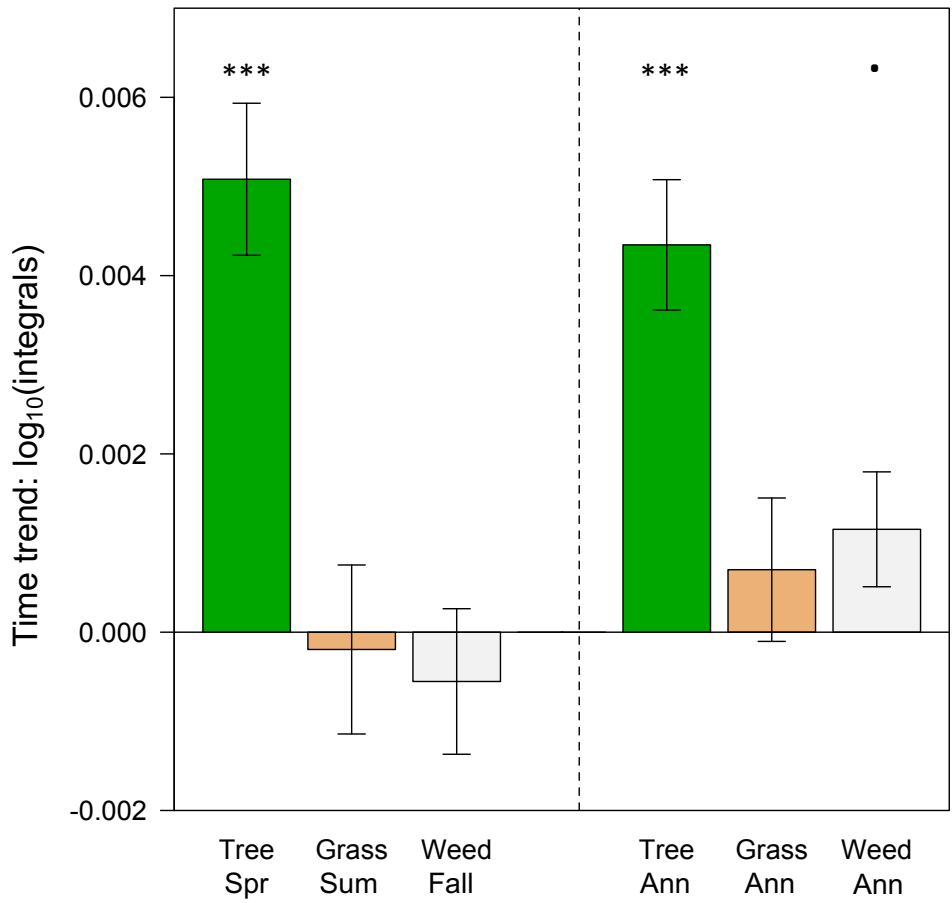

65

66 Figure S1: Temporal trend in pollen integrals for tree, grass, and weed taxa for specific seasons

67 (left) and annual integrals (right). Error bars indicate +/- 1 standard error. '\*\*\*' indicates

68  $p < 0.001$  and '.' indicates  $p$ -values between 0.05-0.1.

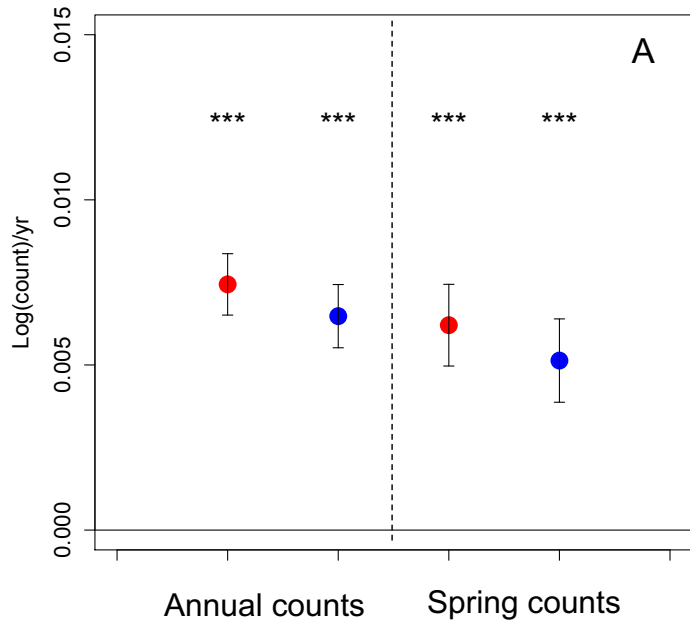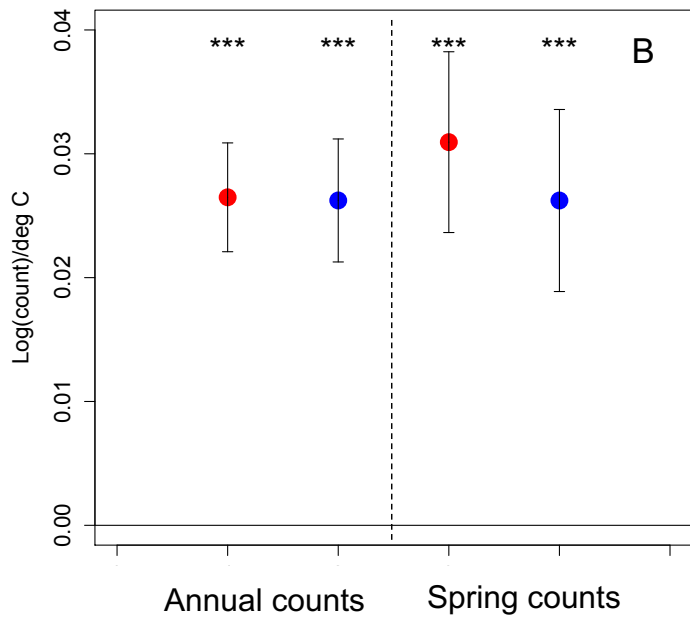

69

70 Figure S2: Temporal trends (A) and temperature sensitivities (B) in pollen stations are robust

71 when examining all stations (red) versus only stations with 10+ years of data (blue).

72



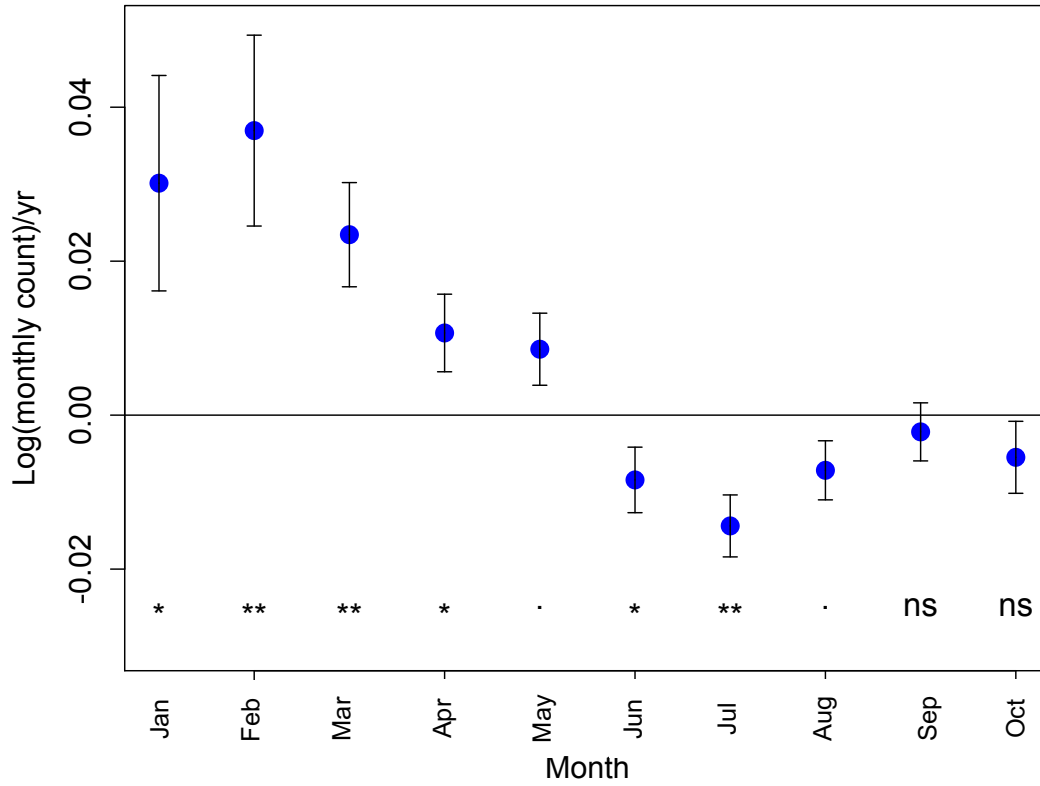

73

74 Figure S3: Trends in monthly integral data across all stations over the 1990-2018 period.

75 November and December did not have enough station-year data to estimate robust trends.

76 Statistics: \* $p < 0.05$ , \*\* $p < 0.01$

77

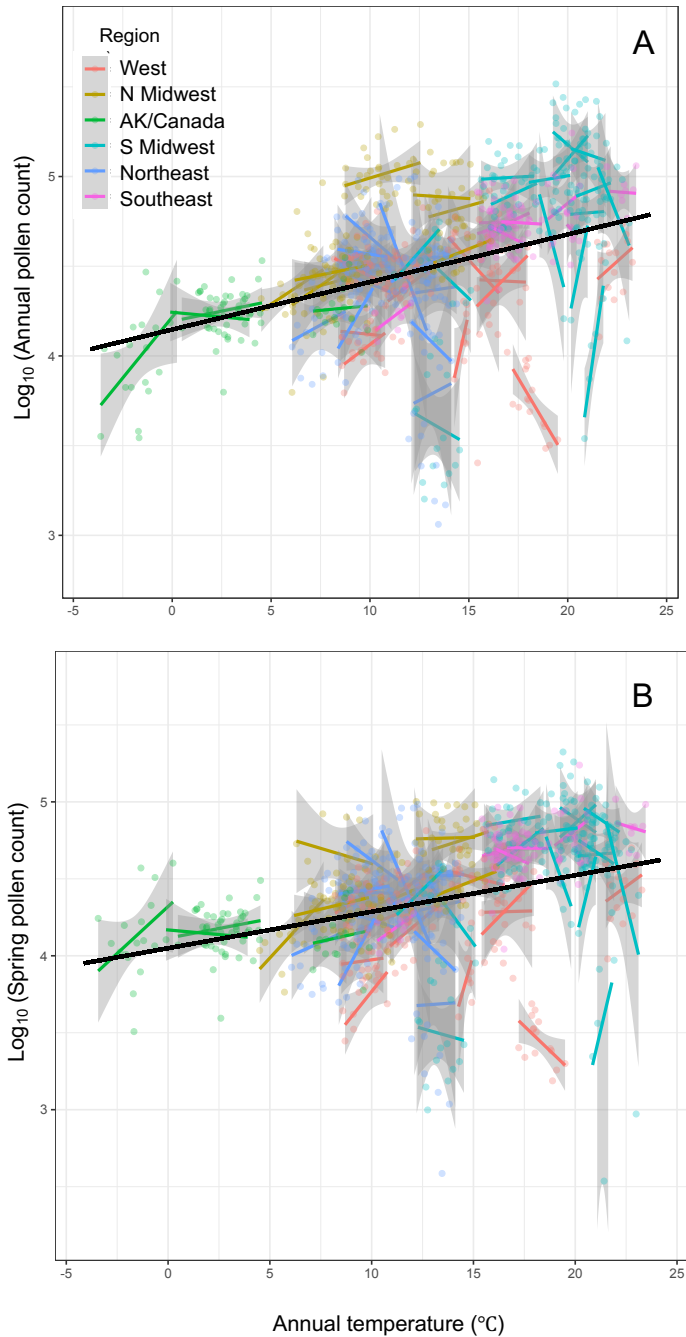

78

79 Figure S4: Pollen-climate relationships with individual years and cities for annual pollen  
 80 integrals (A) and spring pollen integrals (B). Colors indicate region of the country (as in Fig. S6).  
 81 Black line is the fixed effect of annual temperature estimated across all sites from the mixed  
 82 effects model.

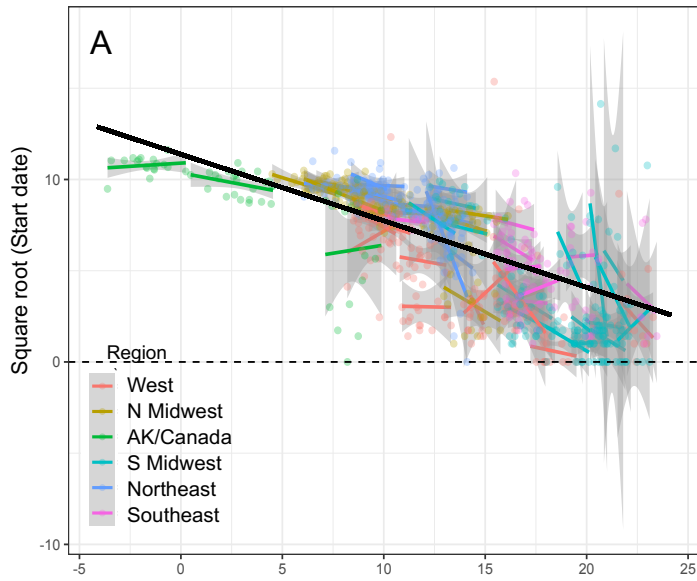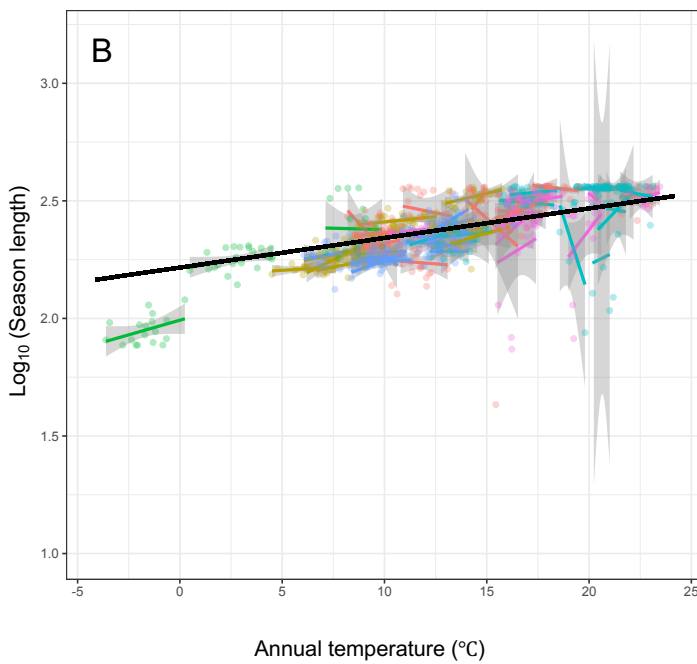

83

84 Figure S5: Pollen-climate relationships with individual years and cities for pollen season start  
 85 date (A) and pollen season length (B). Colors indicate region of the country (as in Fig. S6). Black  
 86 line is the fixed effect of annual temperature estimated across all sites from the mixed effects  
 87 model.

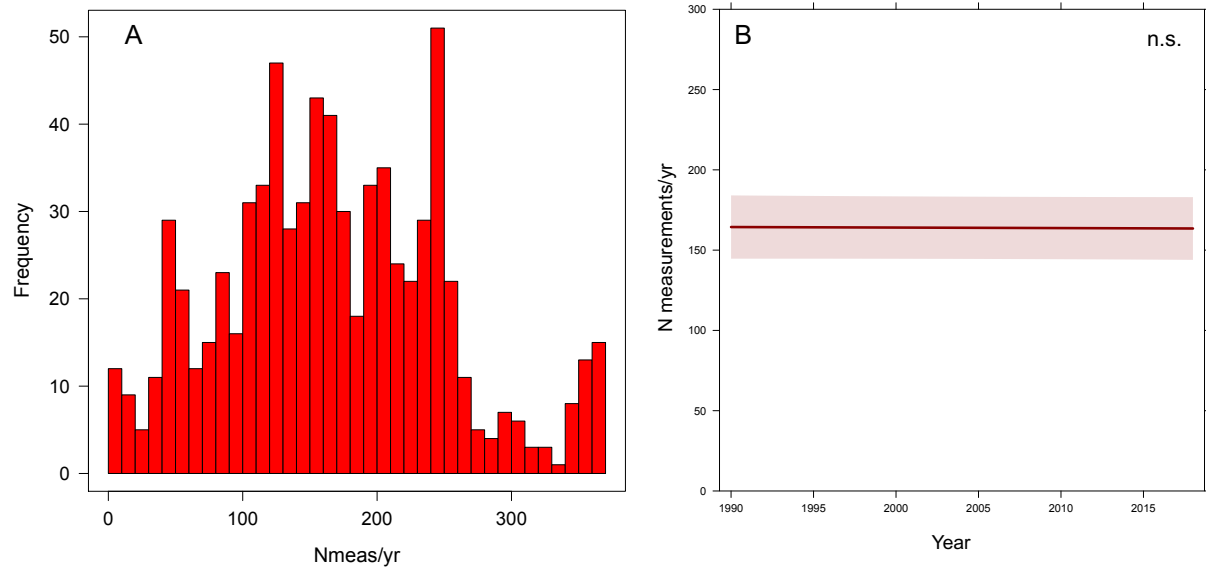

88

89 Figure S6: (A) Histogram of the number of pollen observations per year (Nmeas/yr) across all  
 90 stations with daily pollen data (Table S1) in the study. (B) Temporal trend of the number of  
 91 pollen observations per year across all stations with daily pollen data (Table S1) in the study.

92

93

94

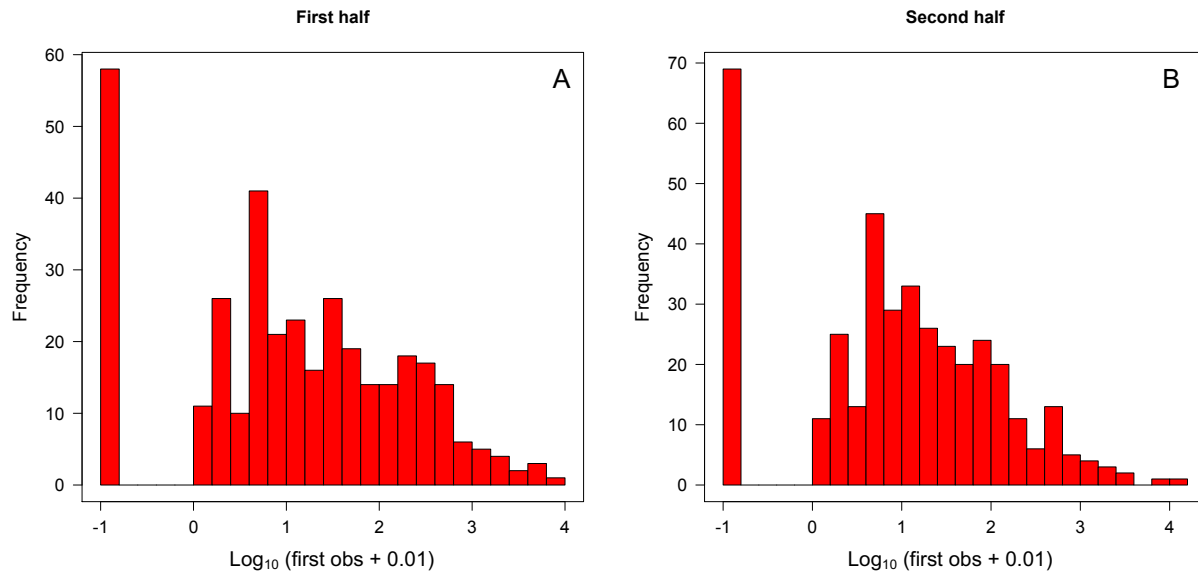

95

96 Figure S7: Initial pollen concentrations are largely similar between the first (A) and second (B)  
 97 halves of station's records. Log<sub>10</sub> +0.01 of the initial measurement in a year are shown and thus a  
 98 measurement of zero is plotted as a value of -1.

99

100

101

102

103

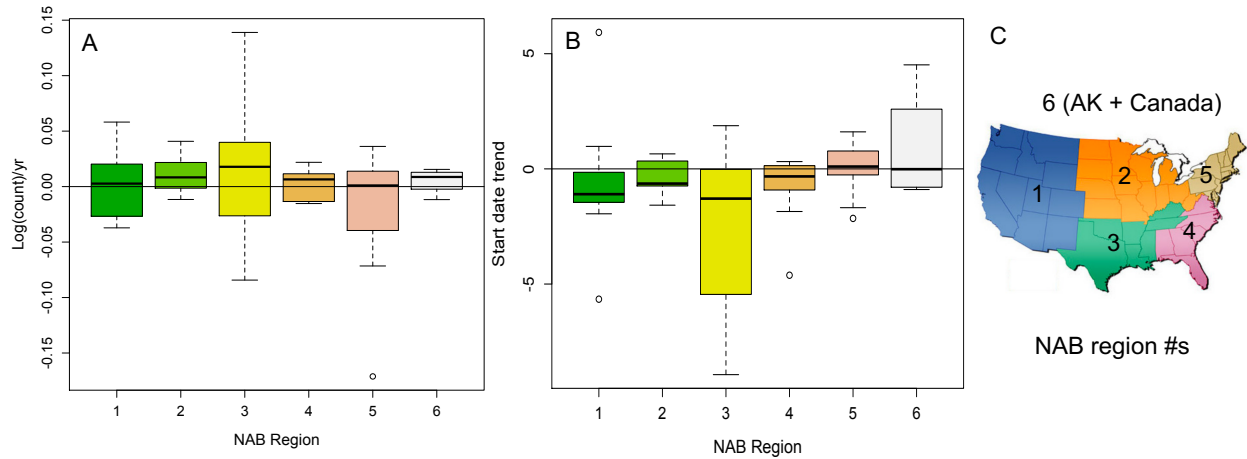

104

105 Figure S8: Regional patterns in pollen metric trends. (A) Boxplot of trends in annual pollen  
 106 counts. (B) Boxplot of trends in pollen season start date. (C) National Allergy Bureau (NAB)  
 107 region numbers plus a sixth region added here for Alaska and Canada stations.

108

109

110

111

112

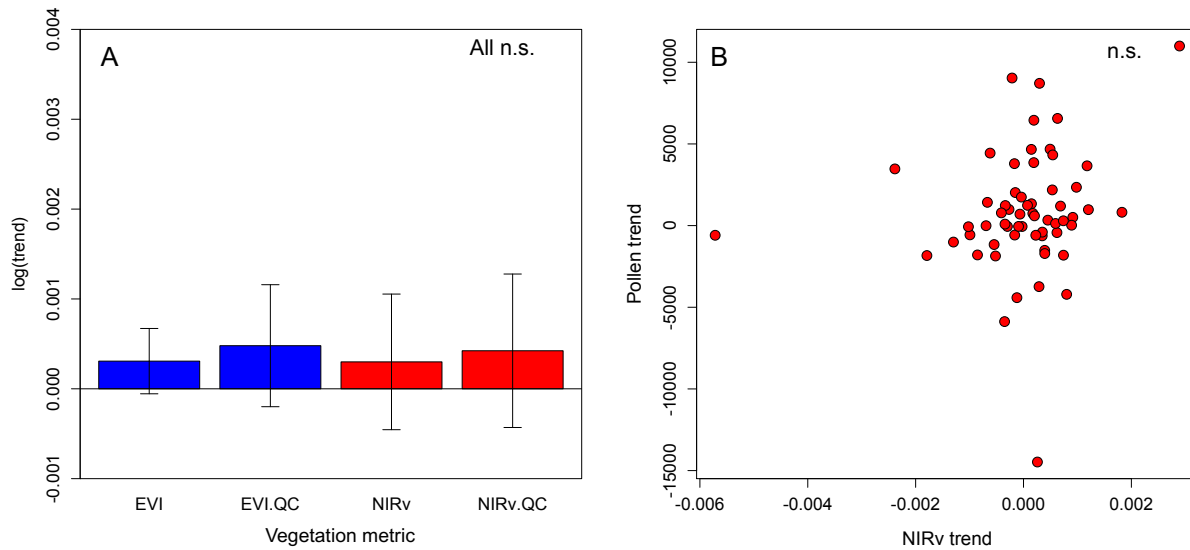

113

114 Figure S9: (A) Temporal trend from 2000-2018 of the grid cells covering all pollen stations in  
 115 this analysis using the enhanced vegetation index (EVI) and near-infrared reflectance of  
 116 vegetation (NIRv) from MODIS data, using all data and a quality-controlled (QC) subset of data.  
 117 Error bars indicate the 95% confidence interval. All trends were non-significant ( $p > 0.11$ ). (B)  
 118 Temporal trends in annual pollen concentrations and annual average NIRv values for all pollen  
 119 stations in the analysis (linear regression  $p$ -value = 0.15).

120

121

122

123

124

125

126

127

128 **References**

- 129 1. M. Collier, P. Uhe, *CMIP5 datasets from the ACCESS1. 0 and ACCESS1. 3 coupled*  
130 *climate models* (Citeseer, 2012).
- 131 2. P. Chylek, J. Li, M. K. Dubey, M. Wang, G. Lesins, Observed and model simulated 20th  
132 century Arctic temperature variability: Canadian earth system model CanESM2.  
133 *Atmospheric Chem. Phys. Discuss.* **11**, 22893–22907 (2011).
- 134 3. M. A. Collier, S. J. Jeffrey, L. D. Rotstayn, K. K. Wong, S. M. Dravitzki, C. Moseneder, C.  
135 Hamalainen, J. I. Syktus, R. Suppiah, J. Antony, in *International Congress on Modelling*  
136 *and Simulation–MODSIM* (2011).
- 137 4. E. M. Volodin, N. A. Dianskii, A. V. Gusev, Simulating present-day climate with the  
138 INMCM4. 0 coupled model of the atmospheric and oceanic general circulations. *Izv.*  
139 *Atmospheric Ocean. Phys.* **46**, 414–431 (2010).
- 140 5. J. Mignot, S. Bony, Presentation and analysis of the IPSL and CNRM climate models used  
141 in CMIP5. *Clim Dyn.* **40**, 2089 (2013).
- 142 6. S. Watanabe, T. Hajima, K. Sudo, T. Nagashima, T. Takemura, H. Okajima, T. Nozawa, H.  
143 Kawase, M. Abe, T. Yokohata, MIROC-ESM 2010: Model description and basic results of  
144 CMIP5-20c3m experiments. *Geosci. Model Dev.* **4**, 845 (2011).
- 145 7. M. Giorgetta, et al., CMIP5 simulations of the Max Planck Institute for Meteorology (MPI-  
146 M) based on the MPI-ESM-LR model: The rcp85 experiment, served by ESGF (2012),  
147 doi:doi:10.1594/WDCC/CMIP5.MXELr8.
- 148 8. Y. Adachi, et al., MRI-ESM1 model output prepared for CMIP5 historical, served by ESGF  
149 (2015), doi:doi:10.1594/WDCC/CMIP5.MRM1hi.
- 150 9. X. Xin, J. Zhang, F. Zhang, T. Wu, X. Shi, J. Li, M. Chu, Q. Liu, J. Yan, Q. Ma, M. Wei,  
151 BCC BCC-CSM2MR model output prepared for CMIP6 CMIP (2018), ,  
152 doi:10.22033/ESGF/CMIP6.1725.
- 153 10. J. Zhang, T. Wu, X. Shi, F. Zhang, J. Li, M. Chu, Q. Liu, J. Yan, Q. Ma, M. Wei, BCC  
154 BCC-ESM1 model output prepared for CMIP6 CMIP historical (2018), ,  
155 doi:10.22033/ESGF/CMIP6.2949.
- 156 11. X. Rong, CAMS CAMS\_CSM1.0 model output prepared for CMIP6 CMIP historical  
157 (2019), , doi:10.22033/ESGF/CMIP6.9754.
- 158 12. N. C. Swart, J. N. Cole, V. V. Kharin, M. Lazare, J. F. Scinocca, N. P. Gillett, J. Anstey, V.  
159 Arora, J. R. Christian, S. Hanna, The Canadian Earth System Model version 5 (CanESM5.  
160 0.3). *Geosci. Model Dev.* **12**, 4823–4873 (2019).



- 161 13. G. Danabasoglu, NCAR CESM2 model output prepared for CMIP6 CMIP historical  
162 (2019), , doi:10.22033/ESGF/CMIP6.7627.
- 163 14. O. Boucher, S. Denvil, A. Caubel, M. A. Foujols, IPSL IPSL-CM6A-LR model output  
164 prepared for CMIP6 CMIP (2018), , doi:10.22033/ESGF/CMIP6.1534.
- 165 15. H. Tatebe, M. Watanabe, MIROC MIROC6 model output prepared for CMIP6 CMIP  
166 (2018), , doi:10.22033/ESGF/CMIP6.881.
- 167 16. S. Yukimoto, T. Koshiro, H. Kawai, N. Oshima, K. Yoshida, S. Urakawa, H. Tsujino, M.  
168 Deushi, T. Tanaka, M. Hosaka, H. Yoshimura, E. Shindo, R. Mizuta, M. Ishii, A. Obata, Y.  
169 Adachi, MRI MRI-ESM2.0 model output prepared for CMIP6 CMIP (2019), ,  
170 doi:10.22033/ESGF/CMIP6.621.
- 171
